# Supplementary material
Source: PubMed Central journal article supplement (PMC4225005)
Supplement: NIHMS605900-supplement-01.pdf [file NIHMS605900-supplement-01.pdf]

Supplementary Table 1: Data of growth cone collapse experiments with various cell signaling inhibitors with numbers observed. Data for each inhibitor is paired with the corresponding control data from the same experiments.

| Inhibitor | Treatment | Number of experiments | Number of growth cones | collapsed growth cones (number) | Percent collapsed | Mean % collapsed per experiment | Standard deviation (%) per experiment |
|-----------|-----------|-----------------------|------------------------|---------------------------------|-------------------|---------------------------------|---------------------------------------|
| Y27632    | Control   | 3                     | 274                    | 71                              | 25.9%             | 29.0%                           | 4.3%                                  |
| Y27632    | LPA       | 3                     | 495                    | 133                             | 26.9%             | 27.7%                           | 2.9%                                  |
| None      | Control   | 3                     | 294                    | 78                              | 26.5%             | 26.7%                           | 0.4%                                  |
| None      | LPA       | 3                     | 246                    | 131                             | 53.2%             | 54.7%                           | 1.8%                                  |
| Y27632    | Control   | 3                     | 587                    | 178                             | 30.0%             | 32.2%                           | 7.0%                                  |
| Y27632    | S1P       | 3                     | 722                    | 237                             | 32.8%             | 33.3%                           | 9.2%                                  |
| None      | Control   | 3                     | 574                    | 166                             | 28.9%             | 32.3%                           | 5.5%                                  |
| None      | S1P       | 3                     | 420                    | 218                             | 51.9%             | 51.5%                           | 2.3%                                  |
| H1152     | Control   | 3                     | 294                    | 88                              | 29.9%             | 30.4%                           | 5.0%                                  |
| H1152     | LPA       | 3                     | 315                    | 102                             | 32.4%             | 32.7%                           | 4.9%                                  |
| None      | Control   | 3                     | 370                    | 99                              | 26.8%             | 26.9%                           | 0.6%                                  |
| None      | LPA       | 3                     | 293                    | 156                             | 53.2%             | 54.4%                           | 1.7%                                  |
| U-73122   | Control   | 6                     | 559                    | 124                             | 22.2%             | 23.4%                           | 8.2%                                  |
| U-73122   | LPA       | 6                     | 361                    | 183                             | 50.7%             | 54.9%                           | 18.9%                                 |
| None      | Control   | 6                     | 617                    | 73                              | 11.8%             | 12.2%                           | 2.9%                                  |
| None      | LPA       | 6                     | 295                    | 183                             | 62.0%             | 60.5%                           | 8.4%                                  |
| U-73122   | Control   | 4                     | 297                    | 41                              | 14%               | 14.5%                           | 4.0%                                  |
| U-73122   | S1P       | 4                     | 151                    | 53                              | 35.1%             | 47.8%                           | 22.4%                                 |
| None      | Control   | 4                     | 130                    | 22                              | 16.5%             | 16.5%                           | 1.8%                                  |
| None      | S1P       | 4                     | 149                    | 77                              | 51.7%             | 57.9%                           | 15.3%                                 |
| BAPTA     | Control   | 2                     | 177                    | 51                              | 28.8%             | 28.3%                           | 3.0%                                  |
| BAPTA     | LPA       | 2                     | 125                    | 79                              | 63.2%             | 62.3%                           | 5.6%                                  |
| None      | Control   | 2                     | 153                    | 43                              | 28.1%             | 26.7%                           | 3.5%                                  |
| None      | LPA       | 2                     | 142                    | 75                              | 52.8%             | 54.7%                           | 8.1%                                  |
| BAPTA     | Control   | 4                     | 443                    | 161                             | 36.3%             | 37.5%                           | 4.2%                                  |
| BAPTA     | S1P       | 4                     | 296                    | 344                             | 57.7%             | 56.9%                           | 4.1%                                  |
| None      | Control   | 3                     | 265                    | 94                              | 35.5%             | 31.7%                           | 6.4%                                  |
| None      | S1P       | 3                     | 226                    | 99                              | 43.8%             | 47.0%                           | 8.0%                                  |

|          |         |   |     |     |       |       |       |
|----------|---------|---|-----|-----|-------|-------|-------|
| PTX      | Control | 6 | 832 | 132 | 15.9% | 18.1% | 8.7%  |
| PTX      | LPA     | 6 | 696 | 225 | 32.3% | 32.0% | 14.6% |
| None     | Control | 6 | 740 | 147 | 19.9% | 18.7% | 9.3%  |
| None     | LPA     | 6 | 530 | 236 | 44.5% | 43.5% | 18.7% |
| PTX      | Control | 5 | 632 | 110 | 17.4% | 16.2% | 6.5%  |
| PTX      | S1P     | 5 | 499 | 110 | 22.0% | 22.0% | 10.9% |
| None     | Control | 5 | 466 | 61  | 13.1% | 13.0% | 9.8%  |
| None     | S1P     | 5 | 529 | 170 | 32.1% | 36.5% | 13.6% |
| PD98059  | Control | 3 | 289 | 72  | 24.9% | 25.7% | 3.4%  |
| PD98059  | LPA     | 3 | 219 | 93  | 42.5% | 44.7% | 8.1%  |
| None     | Control | 3 | 362 | 91  | 25.1% | 25.2% | 1.2%  |
| None     | LPA     | 3 | 274 | 134 | 48.9% | 48.5% | 5.8%  |
| PD98059  | Control | 3 | 850 | 258 | 30.4% | 32.2% | 5.4%  |
| PD98059  | S1P     | 3 | 977 | 460 | 47.1% | 44.8% | 3.6%  |
| None     | Control | 3 | 599 | 173 | 28.9% | 29.9% | 3.1%  |
| None     | S1P     | 3 | 370 | 193 | 52.2% | 51.5% | 2.3%  |
| SB203580 | Control | 4 | 391 | 93  | 23.8% | 22.8% | 4.2%  |
| SB203580 | LPA     | 4 | 196 | 58  | 29.6% | 31.9% | 9.2%  |
| None     | Control | 4 | 399 | 99  | 24.8% | 24.3% | 2.0%  |
| None     | LPA     | 4 | 274 | 134 | 48.9% | 48.5% | 5.8%  |
| SB203580 | Control | 3 | 574 | 149 | 26.0% | 27.5% | 5.1%  |
| SB203580 | S1P     | 3 | 463 | 211 | 45.6% | 42.5% | 6.4%  |
| None     | Control | 3 | 599 | 173 | 28.9% | 29.9% | 3.1%  |
| None     | S1P     | 3 | 370 | 193 | 52.2% | 51.5% | 2.3%  |
